# Supplementary material
Source: PubMed Central journal article supplement (PMC3375928)
Supplement: supp_pp.112.195263_195263Supplements_resubmission.pdf [file supp_pp.112.195263_195263Supplements_resubmission.pdf]

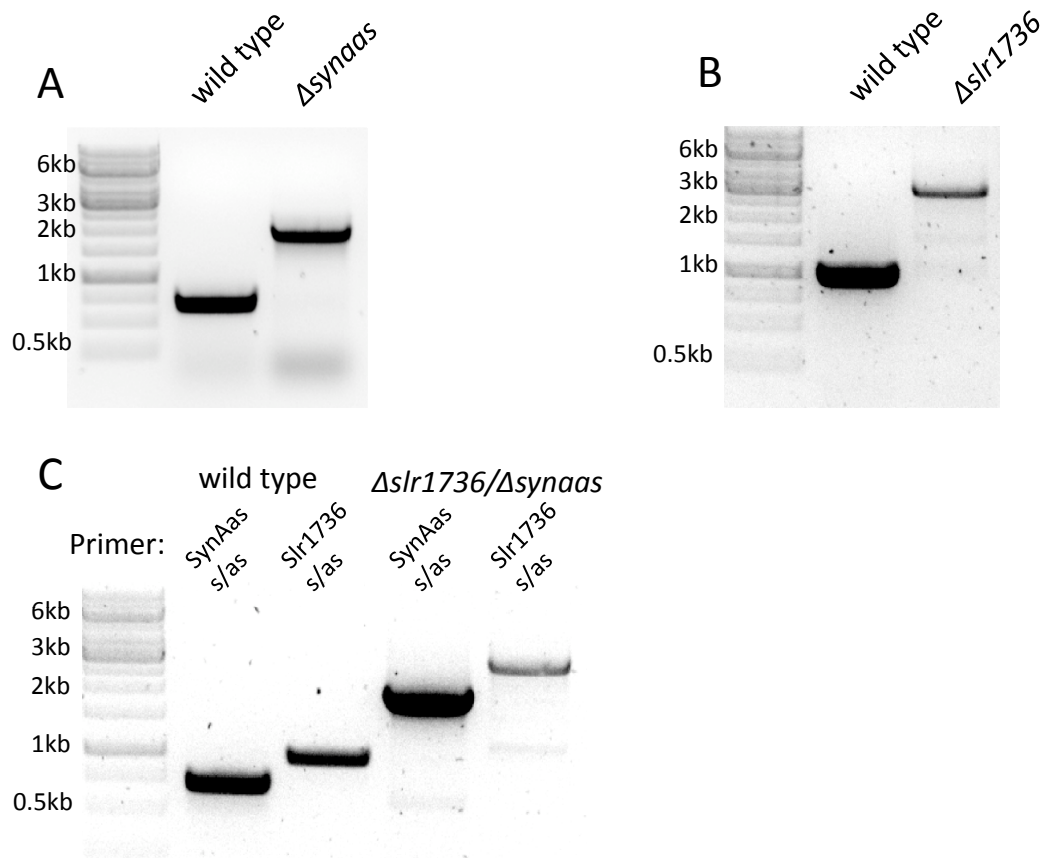

### Supplemental Figure 1

#### Confirmation of the inserted kanamycin and spectinomycin cassette and full segregation of the $\Delta$ slr1736, $\Delta$ slr1609 and $\Delta$ slr1736/ $\Delta$ slr1609 mutant.

Primer SynAAS\_s and SynAAS\_as were used for the confirmation of the  $\Delta$ synaas mutant (A), for the confirmation of the  $\Delta$ slr1736 mutant SLR1736\_s and SLR1736\_as were used (B). Both primer pairs were used to confirm the  $\Delta$ slr1736/ $\Delta$ slr1609 double mutant (C). Size of wild-type PCR products are 710 bp for SynAas and 974 bp for Slr1736 and 1936 bp and 3019 bp for mutant PCR products respectively.

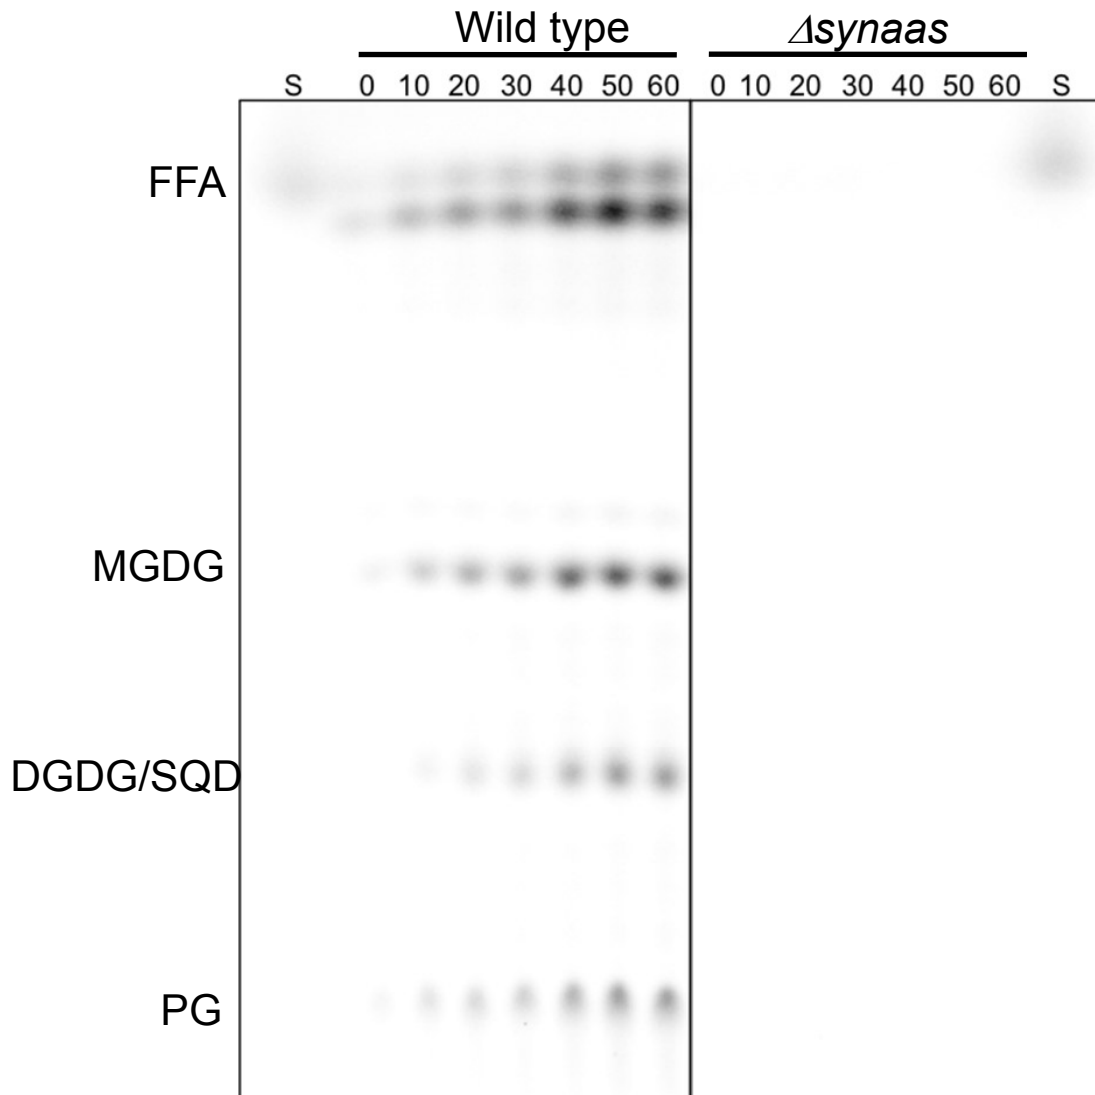

### Supplemental Figure 2

#### Autoradiography of total lipid extracts from $\alpha$ -[ $^{14}\text{C}$ ]linolenic acid-treated wild-type and $\Delta$ *synaas* cells separated by thin layer chromatography

300  $\mu\text{l}$  of *Synechocystis* suspension culture ( $\text{OD}_{750} = 3.0$ ) were incubated for up to 60 minutes with 33  $\mu\text{M}$  final concentration  $\alpha$ -linolenic acid at a 1:10 dilution with  $\alpha$ -[ $^{14}\text{C}$ ]linolenic acid (Hartmann Analytic) at 30°C in the light. For each time point 30  $\mu\text{l}$  cells were harvested and lipids were extracted with 30  $\mu\text{l}$  MeOH/Chloroform (1:1/ v:v) and 15  $\mu\text{l}$  1 M KCl, 0.2 M  $\text{H}_3\text{PO}_4$ . Soluble phase and lipid phase were separated by centrifugation and 5  $\mu\text{l}$  of the lipid phase were spotted on a TLC plate. Lipids were separated on silica plates using acetone:toluene: $\text{H}_2\text{O}$  (91:30:8 v/v/v) as solvent.  $\alpha$ -[ $^{14}\text{C}$ ]linolenic acid (Hartmann Analytic) was used as a standard (S). Spots were visualized by an Image Analyser (FLA-3000, Fujifilm).

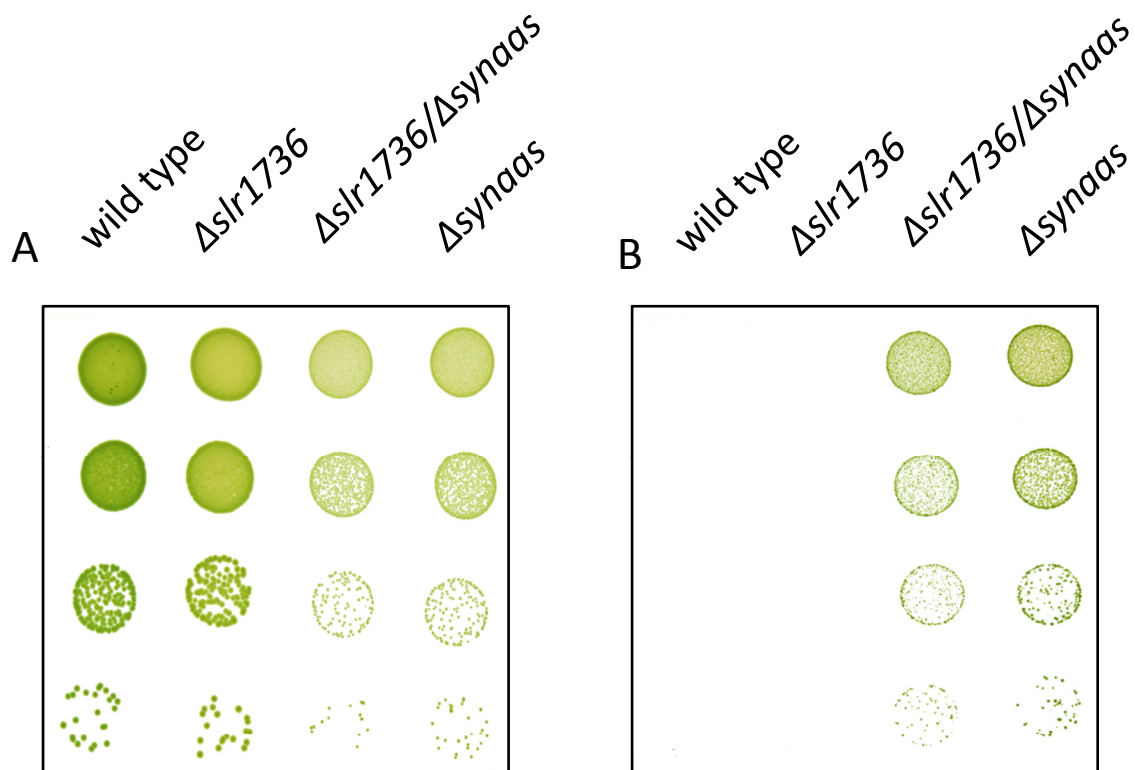

### Supplemental Figure 3

#### Synechocystis wild type and mutant growth assay on plates at higher $\alpha$ -linolenic acid concentrations.

Liquid culture of wild type,  $\Delta slr1736$ ,  $\Delta synaas$ ,  $\Delta slr1736/\Delta synaas$  cultivated in low light ( $15 \mu E m^{-2} s^{-1}$ ) conditions were adjusted to  $OD_{750}$  0.05 and dropped on plates containing 0.1% EtOH (A) or  $20 \mu M$   $\alpha$ -linolenic acid (B). Plates were subsequently grown for 7 day under high light ( $300 \mu E m^{-2} s^{-1}$ ) conditions. The  $\Delta synaas$  and  $\Delta slr1736/\Delta synaas$  mutants are viable under these conditions while wild type and  $\Delta slr1736$  cells are unable to grow.

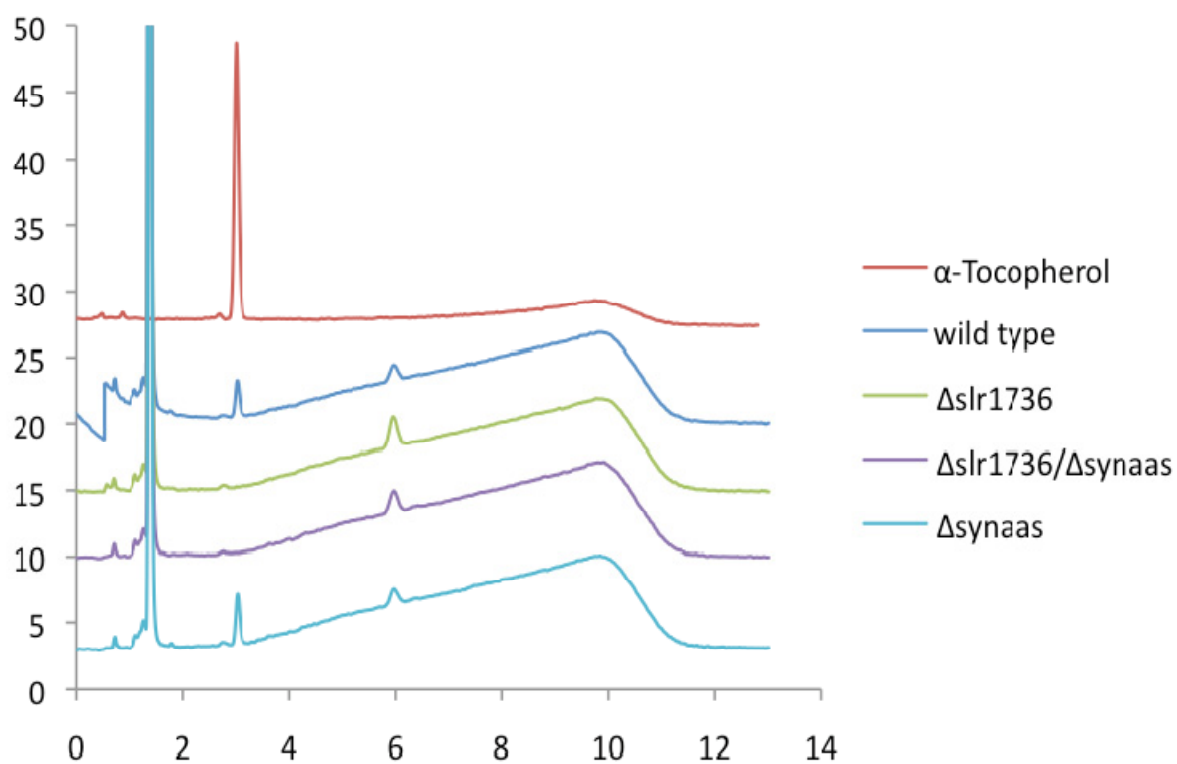

**Supplemental Figure 4**  
 **$\alpha$ -Tocopherol measurement.**

$\alpha$ -Tocopherol was extracted from wild type,  $\Delta slr1736$ ,  $\Delta slr1736/\Delta synaas$  and  $\Delta synaas$  cells and subjected to HPLC. Purified  $\alpha$ -tocopherol (Sigma Aldrich, St. Louis, USA) was used as standard. The specific  $\alpha$ -tocopherol peak is missing in the  $\Delta slr1736$  and  $\Delta slr1736/\Delta synaas$  mutant.

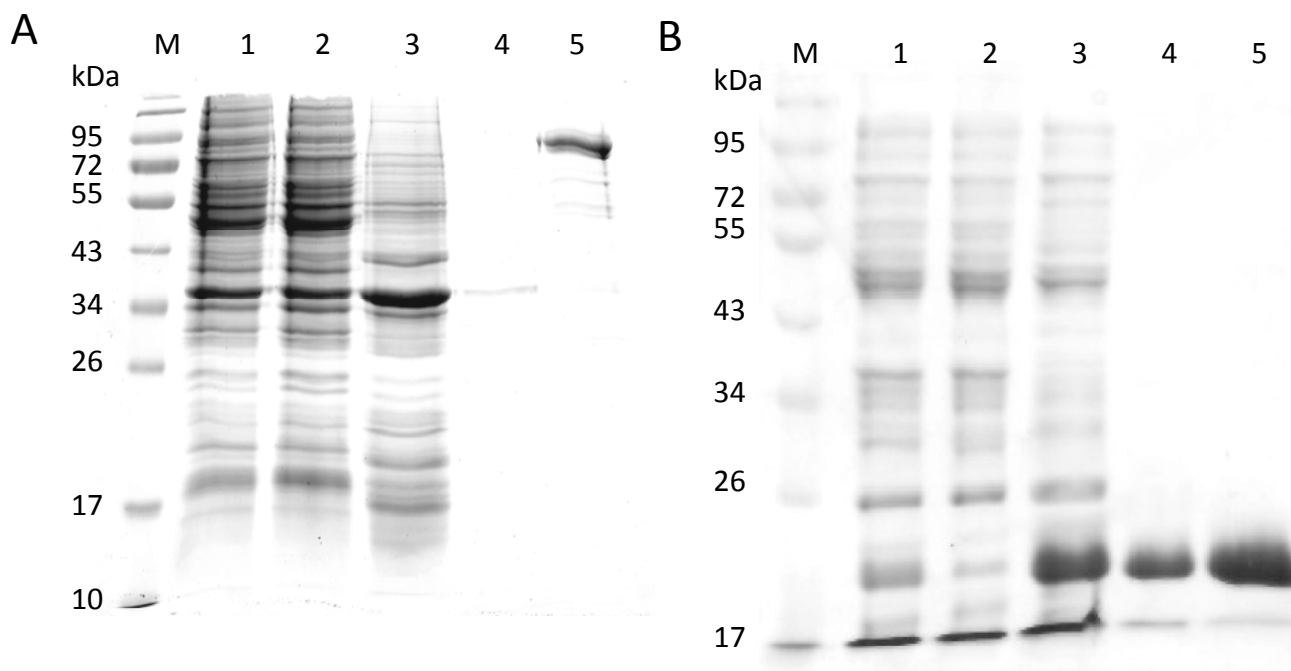

### Supplemental Figure 5

#### Purification of 6x His-tagged SynAas from *Synechocystis sp. 6803* and Acyl Carrier Protein from *Escherichia coli* using Ni-NTA affinity chromatography.

SynAas protein (A) and Acyl Carrier Protein (B) were overexpressed in yeast (InvSC1) and *E. coli* (BLR) cells, respectively. (M) molecular mass marker, (1) crude extract, (2) flow through, (3) first wash step, (4) second wash step, (5) Elution of the protein. SynAas and ACP have an expected molecular mass of 82.5 and 9 kDa including a 6xHis-tag respectively. Please note that ACP is known to run at an apparent molecular weight of approx. 20 kDa in SDS-PAGE due to a high density of anionic amino acid residues (Chan DI, Vogel HJ (2010) Current understanding of fatty acid biosynthesis and the acyl carrier protein. *Biochem J* **430**:1-19).

## Supplemental Methods

### *Tocopherol measurement*

10 ml of cells  $OD_{750} = 1.0$  were collected by centrifugation at 8000 g for 10 min. Tocopherols were extracted in 500  $\mu$ l MeOH and 1 mg  $ml^{-1}$  butylhydroxytoluene (BHT) at 4 °C. Cell debris was removed by centrifugation and 5  $\mu$ l of the supernatant was subjected to HPLC analysis (Ultimate 3000, Dionex with fluorescence detector RF 200, Dionex) using a Phenomenex column (Hyperclone ODS 3  $\mu$ m, C18, length 150 mm, width 4.6 mm). A Methanol (A)-Isopropanol (B) gradient was used (0-8 min 98% A, 2% B; 8-13 min 100%A). Tocopherols were detected by fluorescence using 290 nm excitation and 325 nm emission. Purified  $\alpha$ -tocopherol purchased from Sigma-Aldrich was used as a standard.
